# Supplementary material for: Unified Methodology for the Primary Preclinical In Vivo Screening of New Anticoagulant Pharmaceutical Agents from Hematophagous Organisms
Source: MDPI journal article supplement (doi:10.3390/ijms25073986), 2024-04-03
Supplement: s1 [file s1]

## Supplementary Material

# Unified Methodology for the Primary Preclinical In Vivo Screening of New Anticoagulant Pharmaceutical Agents from Hematophagous Organisms

Maria A. Kostromina <sup>1</sup>, Elena A. Tukhovskaya <sup>2,\*</sup>, Elvira R. Shaykhutdinova <sup>2</sup>, Yuliya A. Palikova <sup>2</sup>, Viktor A. Palikov <sup>2</sup>, Gulsara A. Slashcheva <sup>2</sup>, Alina M. Ismailova <sup>2</sup>, Irina N. Kravchenko <sup>2</sup>, Igor A. Dyachenko <sup>2</sup>, Evgeniy A. Zayats <sup>1</sup>, Yuliya A. Abramchik <sup>1</sup>, Arkady N. Murashev <sup>2</sup> and Roman S. Esipov <sup>1</sup>

<sup>1</sup> Laboratory of Biopharmaceutical Technologies, Shemyakin and Ovchinnikov Institute of Bioorganic Chemistry, Russian Academy of Sciences, Miklukho-Maklaya Street, 16/10, 117997 Moscow, Russia; kostromasha@gmail.com (M.A.K.); eaz96post@gmail.com (E.A.Z.); ugama@yandex.ru (Y.A.A.); esipov@ibch.ru (R.S.E.)

<sup>2</sup> Biological Testing Laboratory, Branch of Shemyakin and Ovchinnikov Institute of Bioorganic Chemistry, Russian Academy of Sciences, Pushchino, ProspektNauki, 6, 142290 Moscow, Russia; shaykhutdinova@ibch.ru (E.R.S.); yuliyapalikova@ibch.ru (Y.A.P.); vpalikov@ibch.ru (V.A.P.); slashcheva\_ga@mail.ru (G.A.S.); ismailowa.a.m@yandex.ru (A.M.I.); ikravchenko@ibch.ru (I.N.K.); dyachenko@ibch.ru (I.A.D.); murashev@ibch.ru (A.N.M.)

\* Correspondence: tukhovskysya@ibch.ru

**Pharmacodynamic profile after substance administration. Time-dependance effect on clotting times and fibrinogen concentration**

**Table S1. Individual values of hemostasis parameters in male ICR mice, saline solution, 5 ml intravenously**

| Saline solution, 15 min       |       |       |       |       |       |       |       |
|-------------------------------|-------|-------|-------|-------|-------|-------|-------|
| Parameter                     |       |       |       |       |       |       |       |
| № mice                        | 1     | 2     | 3     | 4     | 5     | Mean  | SD    |
| APTT, sec                     | 17.2  | 21.9  | 19.7  | 22.7  | 22.1  | 20.7  | 2.3   |
| PTT, sec                      | 9.9   | 10    | 10    | 10.6  | 10.6  | 10.2  | 0.3   |
| Fibrinogen concentration, g/l | 1.779 | 1.696 | 1.544 | 1.736 | 1.831 | 1.717 | 0.109 |
| Saline solution, 30 min       |       |       |       |       |       |       |       |
| Parameter                     |       |       |       |       |       |       |       |
| № mice                        | 6*    | 7     | 8     | 9     | 10    | Mean  | SD    |
| APTT, sec                     | -     | 20.9  | 22.3  | 19.7  | 24.3  | 21.8  | 2.0   |
| PTT, sec                      | -     | 9.6   | 10.3  | 10    | 10.4  | 10.1  | 0.4   |
| Fibrinogen concentration, g/l | -     | 2.039 | 2.164 | 1.838 | 1.964 | 2.001 | 0.137 |
| Saline solution, 60 min       |       |       |       |       |       |       |       |
| Parameter                     |       |       |       |       |       |       |       |
| № mice                        | 11    | 12    | 13    | 14    | 15    | Mean  | SD    |
| APTT, sec                     | 24.7  | 23.5  | 25.4  | 22    | 26.4  | 24.4  | 1.7   |
| PTT, sec                      | 10.1  | 10.1  | 10.3  | 9.9   | 10.6  | 10.2  | 0.3   |
| Fibrinogen concentration, g/l | 1.646 | 1.518 | 1.838 | 1.736 | 1.634 | 1.674 | 0.120 |
| Saline solution, 90 min       |       |       |       |       |       |       |       |
| Parameter                     |       |       |       |       |       |       |       |
| № mice                        | 16    | 17    | 18    | 19    | 20*   | Mean  | SD    |
| APTT, sec                     | 24.8  | 29    | 26.3  | 21.5  | -     | 25.4  | 3.1   |
| PTT, sec                      | 9.8   | 10    | 10    | 9.1   | -     | 9.7   | 0.4   |
| Fibrinogen concentration, g/l | 1.904 | 1.933 | 1.893 | 2.226 | -     | 1.989 | 0.159 |
| Saline solution, 120 min      |       |       |       |       |       |       |       |
| Parameter                     |       |       |       |       |       |       |       |
| № mice                        | 21    | 22    | 23    | 24    | 25    | Mean  | SD    |
| APTT, sec                     | 13.4  | 24.0  | 22.4  | 26.0  | 24.0  | 22.0  | 5.0   |
| PTT, sec                      | 10.3  | 10.5  | 10.9  | 11.5  | 11.2  | 10.9  | 0.5   |
| Fibrinogen concentration, g/l | 1.964 | 1.973 | 1.973 | 1.508 | 1.854 | 1.854 | 0.200 |
| Saline solution, 180 min      |       |       |       |       |       |       |       |
| Parameter                     |       |       |       |       |       |       |       |
| № mice                        | 26    | 27    | 28    | 29    | 30    | Mean  | SD    |
| APTT, sec                     | 24.9  | 23.1  | 25.5  | 21.6  | 26.7  | 24.4  | 2.0   |
| PTT, sec                      | 10.5  | 10    | 10.6  | 10.2  | 10.4  | 10.3  | 0.2   |
| Fibrinogen concentration, g/l | 1.833 | 1.904 | 1.793 | 2.211 | 1.862 | 1.921 | 0.167 |

& Data not received for technical reasons

\* p≤0.05, \*\* p≤0.01 relative to the “saline” group according to the Mann-Whitney U-test

**Table S2. Individual values of hemostasis parameters in male ICR mice, heparin, 20 IU/kg/5 ml intravenously**

| <b>Parameter</b>              |           | <b>Heparin, 20 IU/kg, 15 min</b> |           |           |           |                |              |
|-------------------------------|-----------|----------------------------------|-----------|-----------|-----------|----------------|--------------|
| <b>№ mice</b>                 | <b>31</b> | <b>32</b>                        | <b>33</b> | <b>34</b> | <b>35</b> | <b>Mean</b>    | <b>SD</b>    |
| APTT, sec                     | 31.7      | 37.5                             | 20.4      | 23.8      | 25.2      | <b>27.7 *</b>  | <b>6.8</b>   |
| PTT, sec                      | 11.1      | 11.3                             | 10.5      | 10.5      | 9.8       | <b>10.6</b>    | <b>0.6</b>   |
| Fibrinogen concentration, g/l | 1.42      | 1.698                            | 1.535     | 1.286     | 1.104     | <b>1.409 *</b> | <b>0.228</b> |

  

| <b>Parameter</b>              |           | <b>Heparin, 20 IU/kg, 30 min</b> |                |           |           |                |              |
|-------------------------------|-----------|----------------------------------|----------------|-----------|-----------|----------------|--------------|
| <b>№ mice</b>                 | <b>36</b> | <b>37</b>                        | <b>38&amp;</b> | <b>39</b> | <b>40</b> | <b>Mean</b>    | <b>SD</b>    |
| APTT, sec                     | 21.8      | 32.3                             | -              | 29.9      | 55.2      | <b>34.8 *</b>  | <b>14.3</b>  |
| PTT, sec                      | 10.8      | 11.2                             | -              | 11        | 10.9      | <b>11.0</b>    | <b>0.2</b>   |
| Fibrinogen concentration, g/l | 1.49      | 1.433                            | -              | 1.67      | 1.717     | <b>1.578 *</b> | <b>0.137</b> |

  

| <b>Parameter</b>              |           | <b>Heparin, 20 IU/kg, 60 min</b> |           |           |           |                |              |
|-------------------------------|-----------|----------------------------------|-----------|-----------|-----------|----------------|--------------|
| <b>№ mice</b>                 | <b>41</b> | <b>42&amp;</b>                   | <b>43</b> | <b>44</b> | <b>45</b> | <b>Mean</b>    | <b>SD</b>    |
| APTT, sec                     | 15.2      | -                                | 21        | 37        | 21.9      | <b>23.8</b>    | <b>9.3</b>   |
| PTT, sec                      | 7.4       | -                                | 9.8       | 9.3       | 10.4      | <b>9.2</b>     | <b>1.3</b>   |
| Fibrinogen concentration, g/l | 1.202     | -                                | 1.291     | 0.568     | 1.44      | <b>1.125 *</b> | <b>0.384</b> |

  

| <b>Parameter</b>              |           | <b>Heparin, 20 IU/kg, 90 min</b> |           |                |           |                |              |
|-------------------------------|-----------|----------------------------------|-----------|----------------|-----------|----------------|--------------|
| <b>№ mice</b>                 | <b>46</b> | <b>47</b>                        | <b>48</b> | <b>49&amp;</b> | <b>50</b> | <b>Mean</b>    | <b>SD</b>    |
| APTT, sec                     | 23.6      | 27.8                             | 20.3      | -              | 24.9      | <b>24.2 *</b>  | <b>3.1</b>   |
| PTT, sec                      | 10.5      | 11.2                             | 10.4      | -              | 11.1      | <b>10.8</b>    | <b>0.4</b>   |
| Fibrinogen concentration, g/l | 1.52      | 1.567                            | 1.461     | -              | 1.482     | <b>1.508 *</b> | <b>0.047</b> |

& Data not received for technical reasons

\*  $p \leq 0.05$ , relative to the “saline” group according to the Mann-Whitney U-test

**Table S3. Individual values of hemostasis parameters in male ICR mice, variegin, 3 mg/kg/5 ml intravenously**

| <b>Parameter</b>              |  | <b>Variegin, 3 mg/kg, 15 min</b> |                |           |           |                |                                 |
|-------------------------------|--|----------------------------------|----------------|-----------|-----------|----------------|---------------------------------|
| <b>№ mice</b>                 |  | <b>51</b>                        | <b>52</b>      | <b>53</b> | <b>54</b> | <b>55</b>      | <b>Mean SD</b>                  |
| APTT, sec                     |  | 84.4                             | 56.6           | 49.8      | 52.9      | 56.6           | <b>60.1 **</b><br><b>13.9</b>   |
| PTT, sec                      |  | 14.2                             | 15.1           | 13.5      | 14.1      | 13.8           | <b>14.1 **</b><br><b>0.6</b>    |
| Fibrinogen concentration, g/l |  | 1.292                            | 1.268          | 1.544     | 1.381     | 1.360          | <b>1.369 **</b><br><b>0.108</b> |
| <b>Parameter</b>              |  | <b>Variegin, 3 mg/kg, 30 min</b> |                |           |           |                |                                 |
| <b>№ mice</b>                 |  | <b>56</b>                        | <b>57</b>      | <b>58</b> | <b>59</b> | <b>60</b>      | <b>Mean SD</b>                  |
| APTT, sec                     |  | 44.1                             | 36.8           | 18        | 28.5      | 30.6           | <b>31.6</b><br><b>9.7</b>       |
| PTT, sec                      |  | 11.7                             | 11.1           | 9.7       | 10.3      | 10.5           | <b>10.7</b><br><b>0.8</b>       |
| Fibrinogen concentration, g/l |  | 1.878                            | 1.389          | 1.75      | 1.878     | 1.709          | <b>1.721 *</b><br><b>0.200</b>  |
| <b>Parameter</b>              |  | <b>Variegin, 3 mg/kg, 60 min</b> |                |           |           |                |                                 |
| <b>№ mice</b>                 |  | <b>61</b>                        | <b>62</b>      | <b>63</b> | <b>64</b> | <b>65</b>      | <b>Mean SD</b>                  |
| APTT, sec                     |  | 23.4                             | 38.8           | 18.9      | 31.8      | 33.6           | <b>29.3</b><br><b>8.0</b>       |
| PTT, sec                      |  | 11                               | 11.6           | 11.8      | 11.7      | 10.9           | <b>11.4 **</b><br><b>0.4</b>    |
| Fibrinogen concentration, g/l |  | 1.588                            | 1.45           | 2.175     | 1.437     | 1.599          | <b>1.650</b><br><b>0.303</b>    |
| <b>Parameter</b>              |  | <b>Variegin, 3 mg/kg, 90 min</b> |                |           |           |                |                                 |
| <b>№ mice</b>                 |  | <b>66</b>                        | <b>67&amp;</b> | <b>68</b> | <b>69</b> | <b>70&amp;</b> | <b>Mean SD</b>                  |
| APTT, sec                     |  | 22.8                             | -              | 25.4      | 27.1      | -              | <b>25.1</b><br><b>2.2</b>       |
| PTT, sec                      |  | 9.9                              | -              | 9.8       | 8.8       | -              | <b>9.5</b><br><b>0.6</b>        |
| Fibrinogen concentration, g/l |  | 1.684                            | -              | 1.862     | 1.937     | -              | <b>1.828</b><br><b>0.130</b>    |

\* p≤0.05, \*\* p≤0.01 relative to the “saline” group according to the Mann-Whitney U-test

**Table S4. Individual values of hemostasis parameters in male ICR mice, dabigatran etexilate (10 mg/kg/10ml oral)**

| <b>Parameter</b>              |  | <b>Dabigatran etexilate, 10 mg/kg, 15 min</b>  |           |           |            |            |                                 |
|-------------------------------|--|------------------------------------------------|-----------|-----------|------------|------------|---------------------------------|
| <b>№ mice</b>                 |  | <b>71</b>                                      | <b>72</b> | <b>73</b> | <b>74</b>  | <b>75</b>  | <b>Mean SD</b>                  |
| APTT, sec                     |  | 31.5                                           | 23.9      | 56.4      | 39.9       | 49.5       | <b>40.2 **</b><br><b>13.1</b>   |
| PTT, sec                      |  | 13.9                                           | 11.8      | 15        | 14.6       | 16.4       | <b>14.3 **</b><br><b>1.7</b>    |
| Fibrinogen concentration, g/l |  | 1.767                                          | 1.841     | 1.698     | 1.777      | 1.482      | <b>1.713</b><br><b>0.139</b>    |
| <b>Parameter</b>              |  | <b>Dabigatran etexilate, 10 mg/kg, 30 min</b>  |           |           |            |            |                                 |
| <b>№ mice</b>                 |  | <b>76</b>                                      | <b>77</b> | <b>78</b> | <b>79</b>  | <b>80</b>  | <b>Mean SD</b>                  |
| APTT, sec                     |  | 49.6                                           | 36.5      | 39.9      | 43         | 58.5       | <b>45.5 **</b><br><b>8.7</b>    |
| PTT, sec                      |  | 14.2                                           | 13.1      | 11.9      | 13.3       | 15.1       | <b>13.5 **</b><br><b>1.2</b>    |
| Fibrinogen concentration, g/l |  | 1.652                                          | 1.248     | 1.777     | 1.583      | 1.433      | <b>1.539 **</b><br><b>0.204</b> |
| <b>Parameter</b>              |  | <b>Dabigatran etexilate, 10 mg/kg, 60 min</b>  |           |           |            |            |                                 |
| <b>№ mice</b>                 |  | <b>81</b>                                      | <b>82</b> | <b>83</b> | <b>84</b>  | <b>85</b>  | <b>Mean SD</b>                  |
| APTT, sec                     |  | 41.3                                           | 31.9      | 42.3      | 43.8       | 55.9       | <b>43.0 **</b><br><b>8.6</b>    |
| PTT, sec                      |  | 12                                             | 12.3      | 12.1      | 12.7       | 14         | <b>12.6 **</b><br><b>0.8</b>    |
| Fibrinogen concentration, g/l |  | 1.505                                          | 1.374     | 1.863     | 1.583      | 1.468      | <b>1.559</b><br><b>0.186</b>    |
| <b>Parameter</b>              |  | <b>Dabigatran etexilate, 10 mg/kg, 90 min</b>  |           |           |            |            |                                 |
| <b>№ mice</b>                 |  | <b>86</b>                                      | <b>87</b> | <b>88</b> | <b>89*</b> | <b>90</b>  | <b>Mean SD</b>                  |
| APTT, sec                     |  | 35.1                                           | 38        | 31.9      | -          | 35.5       | <b>35.1 *</b><br><b>2.5</b>     |
| PTT, sec                      |  | 12                                             | 12.9      | 12        | -          | 12.2       | <b>12.3 *</b><br><b>0.4</b>     |
| Fibrinogen concentration, g/l |  | 1.727                                          | 1.355     | 1.543     | -          | 1.591      | <b>1.554</b><br><b>0.154</b>    |
| <b>Parameter</b>              |  | <b>Dabigatran etexilate, 10 mg/kg, 120 min</b> |           |           |            |            |                                 |
| <b>№ mice</b>                 |  | <b>91</b>                                      | <b>92</b> | <b>93</b> | <b>94</b>  | <b>95</b>  | <b>Mean SD</b>                  |
| APTT, sec                     |  | 21.2                                           | 30.6      | 23        | 37         | 26.2       | <b>27.6</b><br><b>6.4</b>       |
| PTT, sec                      |  | 20.1                                           | 10.7      | 10.3      | 10.8       | 22.6       | <b>14.9</b><br><b>6.0</b>       |
| Fibrinogen concentration, g/l |  | 2.377                                          | 1.652     | 1.875     | 1.600      | 2.078      | <b>1.916</b><br><b>0.320</b>    |
| <b>Parameter</b>              |  | <b>Dabigatran etexilate, 10 mg/kg, 180 min</b> |           |           |            |            |                                 |
| <b>№ mice</b>                 |  | <b>96</b>                                      | <b>97</b> | <b>98</b> | <b>99</b>  | <b>100</b> | <b>Mean SD</b>                  |
| APTT, sec                     |  | 31.2                                           | 24.2      | 28        | 26.2       | 31.2       | <b>28.2</b><br><b>3.1</b>       |
| PTT, sec                      |  | 11.9                                           | 10.9      | 11.1      | 22.6       | 12.4       | <b>13.8</b><br><b>5.0</b>       |
| Fibrinogen concentration, g/l |  | 2.022                                          | 1.634     | 1.583     | 2.078      | 1.426      | <b>1.749</b><br><b>0.286</b>    |

& Data not received for technical reasons

\* p≤0.05, \*\* p≤0.01 relative to the “saline” group according to the Mann-Whitney U-test

**Table S5. Individual values of hemostasis parameters in male ICR mice, dabigatran etexilate (25 mg/kg/10ml oral)**

| <b>Parameter</b>              |  | <b>Dabigatran etexilate, 25 mg/kg, 15 min</b>  |            |            |            |            |                          |
|-------------------------------|--|------------------------------------------------|------------|------------|------------|------------|--------------------------|
| <b>№ mice</b>                 |  | <b>101</b>                                     | <b>102</b> | <b>103</b> | <b>104</b> | <b>105</b> | <b>Mean SD</b>           |
| APTT, sec                     |  | 78.8                                           | 85.9       | 71.5       | 69.8       | 67.7       | <b>74.7 **</b><br>7.5    |
| PTT, sec                      |  | 24                                             | 27.2       | 24         | 20.8       | 19.7       | <b>23.1 **</b><br>3.0    |
| Fibrinogen concentration, g/l |  | 0.469                                          | 0.374      | 0.81       | 0.197      | 1.264      | <b>0.623 **</b><br>0.422 |
| <b>Parameter</b>              |  | <b>Dabigatran etexilate, 25 mg/kg, 30 min</b>  |            |            |            |            |                          |
| <b>№ mice</b>                 |  | <b>106</b>                                     | <b>107</b> | <b>108</b> | <b>109</b> | <b>110</b> | <b>Mean SD</b>           |
| APTT, sec                     |  | 47.8                                           | 56.9       | 37.3       | 50         | 56.3       | <b>49.7 **</b><br>8.0    |
| PTT, sec                      |  | 14.5                                           | 17.6       | 13.6       | 13.5       | 15.9       | <b>15.0 **</b><br>1.7    |
| Fibrinogen concentration, g/l |  | 1.667                                          | 1.421      | 1.97       | 1.521      | 1.514      | <b>1.619</b><br>0.215    |
| <b>Parameter</b>              |  | <b>Dabigatran etexilate, 25 mg/kg, 60 min</b>  |            |            |            |            |                          |
| <b>№ mice</b>                 |  | <b>111</b>                                     | <b>112</b> | <b>113</b> | <b>114</b> | <b>115</b> | <b>Mean SD</b>           |
| APTT, sec                     |  | 45.9                                           | 47.7       | 47.5       | 55.2       | 75.8       | <b>54.4 **</b><br>12.5   |
| PTT, sec                      |  | 14.5                                           | 14.1       | 14.1       | 15.2       | 19.4       | <b>15.5 **</b><br>2.2    |
| Fibrinogen concentration, g/l |  | 1.842                                          | 1.915      | 1.684      | 1.579      | 1.254      | <b>1.655</b><br>0.260    |
| <b>Parameter</b>              |  | <b>Dabigatran etexilate, 25 mg/kg, 90 min</b>  |            |            |            |            |                          |
| <b>№ mice</b>                 |  | <b>116</b>                                     | <b>117</b> | <b>118</b> | <b>119</b> | <b>120</b> | <b>Mean SD</b>           |
| APTT, sec                     |  | 30.9                                           | 46.1       | 41.1       | 43.8       | 65.4       | <b>45.5 **</b><br>12.6   |
| PTT, sec                      |  | 13.7                                           | 13.1       | 13.1       | 13.2       | 16.9       | <b>14.0 **</b><br>1.6    |
| Fibrinogen concentration, g/l |  | 1.659                                          | 1.684      | 1.793      | 1.618      | 1.507      | <b>1.652</b><br>0.104    |
| <b>Parameter</b>              |  | <b>Dabigatran etexilate, 25 mg/kg, 120 min</b> |            |            |            |            |                          |
| <b>№ mice</b>                 |  | <b>121</b>                                     | <b>122</b> | <b>123</b> | <b>124</b> | <b>125</b> | <b>Mean SD</b>           |
| APTT, sec                     |  | 38.1                                           | 37.5       | 35.2       | 44.2       | 16.7       | <b>34.3</b><br>10.4      |
| PTT, sec                      |  | 11.9                                           | 11.9       | 12.1       | 13         | 20.5       | <b>13.9 **</b><br>3.7    |
| Fibrinogen concentration, g/l |  | 1.243                                          | 1.505      | 1.626      | 1.512      | 2.299      | <b>1.637</b><br>0.396    |
| <b>Parameter</b>              |  | <b>Dabigatran etexilate, 25 mg/kg, 180 min</b> |            |            |            |            |                          |
| <b>№ mice</b>                 |  | <b>126</b>                                     | <b>127</b> | <b>128</b> | <b>129</b> | <b>130</b> | <b>Mean SD</b>           |
| APTT, sec                     |  | 35.7                                           | 33.3       | 41.4       | 56.7       | 47.8       | <b>43.0 **</b><br>9.5    |
| PTT, sec                      |  | 11.7                                           | 11.2       | 12.8       | 14.5       | 14         | <b>12.8 **</b><br>1.4    |
| Fibrinogen concentration, g/l |  | 1.757                                          | 1.679      | 1.661      | 1.461      | 1.591      | <b>1.630 **</b><br>0.111 |

\*\* p<0.01 relative to the “saline” group according to the Mann-Whitney U-test

**Table S6. Tail-cut bleeding time after substance administration in male SD rats (individual values)**

| Number of animals in the group | Saline     | Heparin, 20 IU/kg, I.V. | Heparin, 100 IU/kg, I.V. | Dabigatran etexilate, 12.5 mg/kg P.O. | Dabigatran etexilate, 25 mg/kg P.O. | Variegin, 3.75 mg/kg, I.V. | Variegin, 7.5 mg/kg, I.V. | Variegin, 30 mg/kg, I.V. |
|--------------------------------|------------|-------------------------|--------------------------|---------------------------------------|-------------------------------------|----------------------------|---------------------------|--------------------------|
| 1                              | 252        | 1101                    | 1800                     | 1095                                  | 1800                                | 1511                       | 1800                      | 1800                     |
| 2                              | 586        | 953                     | 1800                     | 959                                   | 1800                                | 1338                       | 1800                      | 1800                     |
| 3                              | 376        | 1164                    | 1800                     | 691                                   | 1800                                | 1217                       | 1800                      | 1800                     |
| 4                              | 343        | 1185                    | 1800                     | 950                                   | 1800                                | 1113                       | 1800                      | 1800                     |
| 5                              | 268        | 1331                    | 1800                     | 1299                                  | 1800                                | 1247                       | 1800                      | 1800                     |
| 6                              | 366        | 1203                    | 1800                     | 1230                                  | 1800                                | 1409                       | 1800                      | 1800                     |
| <b>Mean</b>                    | <b>365</b> | <b>1156 **</b>          | <b>1800 **</b>           | <b>1037 **</b>                        | <b>1800 **</b>                      | <b>1306 **</b>             | <b>1800 **</b>            | <b>1800 **</b>           |
| <b>SD</b>                      | <b>120</b> | <b>125</b>              | <b>0</b>                 | <b>220</b>                            | <b>0</b>                            | <b>143</b>                 | <b>0</b>                  | <b>0</b>                 |

\*\* p≤0.01 relative to the “saline” group according to the Mann-Whitney U-test

**Table S7. Individual values of APTT after substance administration in male SD rats in tail-cut bleeding time (individual values)**

| Number of animals in the group | Saline      | Heparin, 20 IU/kg, I.V. | Heparin, 100 IU/kg, I.V. | Dabigatran etexilate, 12.5 mg/kg P.O. | Dabigatran etexilate, 25 mg/kg P.O. | Variegin, 3.75 mg/kg, I.V. | Variegin, 7.5 mg/kg, I.V. | Variegin, 30 mg/kg, I.V. | Intact animal |
|--------------------------------|-------------|-------------------------|--------------------------|---------------------------------------|-------------------------------------|----------------------------|---------------------------|--------------------------|---------------|
| 1                              | 15.1        | 22.3                    | 14.6                     | 37.3                                  | 43.7                                | 39                         | 49                        | 145.4                    | 17.8          |
| 2                              | 17          | 25.3                    | 16                       | 27.2                                  | 40.4                                | 39.9                       | 47.2                      | 184.8                    | 17.1          |
| 3                              | 20.3        | 22.3                    | 111.7                    | 27.6                                  | 37.3                                | 38.5                       | 42.6                      | 106.5                    | 17.1          |
| 4                              | 20.8        | 27.5                    | 100.4                    | 36.4                                  | 44.9                                | 37.1                       | ND                        | 146                      | ND            |
| 5                              | 15.3        | 22.5                    | 20.2                     | 35.6                                  | 34.2                                | 39                         | ND                        | 214.9                    | ND            |
| 6                              | 21.2        | 23.6                    | 160.5                    | 34.8                                  | 36.7                                | 38.7                       | ND                        | 211.4                    | ND            |
| <b>Mean</b>                    | <b>18.3</b> | <b>23.9 **</b>          | <b>70.6</b>              | <b>33.2 **</b>                        | <b>39.5 **</b>                      | <b>38.7 **</b>             | <b>46.3 *</b>             | <b>168.2 **</b>          | <b>17.3</b>   |
| <b>SD</b>                      | <b>2.8</b>  | <b>2.1</b>              | <b>62.2</b>              | <b>4.5</b>                            | <b>4.2</b>                          | <b>0.9</b>                 | <b>3.3</b>                | <b>42.8</b>              | <b>0.4</b>    |

\* p≤0.05, \*\* p≤0.01 relative to the “saline” group according to the Mann-Whitney U-test

**Table S8. Individual values of PTT after substance administration in male SD rats in tail-cut bleeding time (individual values)**

| Number of animals in the group | Saline      | Heparin, 20 IU/kg, I.V. | Heparin, 100 IU/kg, I.V. | Dabigatran etexilate, 12.5 mg/kg P.O. | Dabigatran etexilate, 25 mg/kg P.O. | Variegin, 3.75 mg/kg, I.V. | Variegin, 7.5 mg/kg, I.V. | Variegin, 30 mg/kg, I.V. | Intact animal |
|--------------------------------|-------------|-------------------------|--------------------------|---------------------------------------|-------------------------------------|----------------------------|---------------------------|--------------------------|---------------|
| 1                              | 19.5        | 21.3                    | 18.9                     | 27.2                                  | 38.7                                | 29.4                       | 31.5                      | 101.2                    | 22.4          |
| 2                              | 20.2        | 21.4                    | 19.9                     | 25.0                                  | 34.5                                | 31.0                       | 35.7                      | 161.9                    | 23.3          |
| 3                              | 19.9        | 20.5                    | 24.1                     | 24.8                                  | 30.4                                | 30.9                       | 30.3                      | 79.1                     | 21.0          |
| 4                              | 20.4        | 23.4                    | 24.3                     | 28.0                                  | 34.7                                | 29.2                       | ND                        | 100.9                    | ND            |
| 5                              | 19.3        | 22.0                    | 20.0                     | 28.3                                  | 27.1                                | 28.8                       | ND                        | 212.4                    | ND            |
| 6                              | 20.1        | 23.3                    | 29.6                     | 28.8                                  | 34.8                                | 29.4                       | ND                        | 208.8                    | ND            |
| <b>Mean</b>                    | <b>19.9</b> | <b>22.0 **</b>          | <b>22.8</b>              | <b>27.0 **</b>                        | <b>33.4 **</b>                      | <b>29.8 **</b>             | <b>32.5 *</b>             | <b>144.1 **</b>          | <b>22.2 *</b> |
| <b>SD</b>                      | <b>0.4</b>  | <b>1.2</b>              | <b>4.0</b>               | <b>1.7</b>                            | <b>4.0</b>                          | <b>0.9</b>                 | <b>2.8</b>                | <b>58.5</b>              | <b>1.2</b>    |

\* p≤0.05, \*\* p≤0.01 relative to the “saline” group according to the Mann-Whitney U-test

**Table S9. Individual values of fibrinogen concentration after substance administration in male SD rats in tail-cut bleeding time (individual values)**

| Number of animals in the group | Saline       | Heparin, 20 IU/kg, I.V. | Heparin, 100 IU/kg, I.V. | Dabigatran etexilate, 12.5 mg/kg P.O. | Dabigatran etexilate, 25 mg/kg P.O. | Variegin, 3.75 mg/kg, I.V. | Variegin, 7.5 mg/kg, I.V. | Variegin, 30 mg/kg, I.V. | Intact animal  |
|--------------------------------|--------------|-------------------------|--------------------------|---------------------------------------|-------------------------------------|----------------------------|---------------------------|--------------------------|----------------|
| 1                              | 2.377        | 1.933                   | 1.646                    | 1.97                                  | 1.626                               | 1.868                      | 1.619                     | 0.967                    | 1.922          |
| 2                              | 2.197        | 1.9                     | 1.683                    | 2.091                                 | 2.078                               | 1.777                      | 1.740                     | 0.739                    | 1.994          |
| 3                              | 2.053        | 1.991                   | 1.816                    | 2.299                                 | 2.254                               | 3.001                      | 1.603                     | 1.053                    | 2.003          |
| 4                              | 2.299        | 1.596                   | 1.665                    | 2.078                                 | 1.701                               | 1.956                      | ND                        | 0.912                    | ND             |
| 5                              | 2.531        | 1.956                   | 1.665                    | 2.041                                 | 2.029                               | 1.900                      | ND                        | 0.486                    | ND             |
| 6                              | 2.377        | 2.003                   | 1.588                    | 2.053                                 | 1.701                               | 1.816                      | ND                        | 0.5                      | ND             |
| <b>Mean</b>                    | <b>2.306</b> | <b>1.897 **</b>         | <b>1.677 **</b>          | <b>2.089 *</b>                        | <b>1.898 *</b>                      | <b>2.053 *</b>             | <b>1.654 *</b>            | <b>0.776 **</b>          | <b>1.973 *</b> |
| <b>SD</b>                      | <b>0.165</b> | <b>0.152</b>            | <b>0.076</b>             | <b>0.111</b>                          | <b>0.256</b>                        | <b>0.469</b>               | <b>0.075</b>              | <b>0.242</b>             | <b>0.044</b>   |

\* p≤0.05, \*\* p≤0.01 relative to the “saline” group according to the Mann-Whitney U-test



**Table S10. Results of hematological analysis in male SD rats in tail-cut bleeding time**

| Parameters                                           | Saline        | Heparin,<br>20 IU/kg, I.V. | Dabigatran<br>etexilate,<br>12.5 mg/kg P.O. | Dabigatran<br>etexilate,<br>25 mg/kg P.O. | Variegin, 3.75<br>mg/kg, I.V. | Variegin,<br>7.5 mg/kg, I.V. | Intact animal      |
|------------------------------------------------------|---------------|----------------------------|---------------------------------------------|-------------------------------------------|-------------------------------|------------------------------|--------------------|
|                                                      | n=6           | n=6                        | n=6                                         | n=6                                       | n=3                           | n=3                          | n=3                |
| Leucocyte, 10 <sup>9</sup> /l                        | 10.6 ± 1.6    | 13.4 ± 3.2                 | 9.4 ± 0.6                                   | 9.8 ± 1.8                                 | 9.7 ± 1.8                     | 8.5 ± 1.3                    | 10.8 ± 1.9         |
| Lymphocyte, 10 <sup>9</sup> /l                       | 9.2 ± 1.5     | 12.1 ± 2.7                 | 8.3 ± 0.6                                   | 8.6 ± 1.6                                 | 8.3 ± 1.7                     | 7.5 ± 1.1                    | 9.7 ± 1.6          |
| Monocyte, 10 <sup>9</sup> /l                         | 0.5 ± 0.1     | 0.4 ± 0.2                  | 0.3 ± 0.1                                   | 0.3 ± 0.1                                 | 0.4 ± 0.1                     | 0.3 ± 0.1 *                  | 0.4 ± 0.1          |
| Granulocyte, 10 <sup>9</sup> /l                      | 0.9 ± 0.1     | 0.9 ± 0.5                  | 0.8 ± 0.1                                   | 0.9 ± 0.2                                 | 1.0 ± 0.2                     | 0.7 ± 0.1                    | 0.8 ± 0.2          |
| Lymphocyte, %                                        | 87.0 ± 1.5    | 90.4 ± 2.0                 | 88.5 ± 0.4                                  | 87.5 ± 1.4                                | 85.4 ± 2.9                    | 88.3 ± 0.8                   | 89.2 ± 0.7         |
| Monocyte, %                                          | 4.5 ± 0.3     | 3.2 ± 0.5                  | 3.4 ± 0.4                                   | 3.1 ± 0.4                                 | 4.0 ± 0.8                     | 4.0 ± 0.4                    | 3.3 ± 0.4          |
| Granulocyte, %                                       | 8.5 ± 1.3     | 6.4 ± 1.5                  | 8.1 ± 0.6                                   | 9.4 ± 1.6                                 | 10.6 ± 2.6                    | 7.7 ± 0.5                    | 7.5 ± 0.3          |
| Red blood cell, 10 <sup>12</sup> /l                  | 8.69 ± 0.32   | 8.90 ± 0.26                | 9.18 ± 0.12                                 | 8.83 ± 0.19                               | 8.65 ± 0.36                   | 8.63 ± 0.66                  | 9.21 ± 0.33        |
| Hemoglobin, g/l                                      | 165 ± 4       | 159 ± 7                    | 161 ± 5 *                                   | 159 ± 2 *                                 | 159 ± 9                       | 157 ± 13 *                   | 166 ± 6            |
| Hematocrit, l/l                                      | 0.472 ± 0.017 | 0.483 ± 0.023<br>**        | 0.494 ± 0.016                               | 0.479 ± 0.004                             | 0.472 ± 0.027                 | 0.463 ± 0.041<br>**          | 0.504 ± 0.016      |
| Mean cell volume, fl                                 | 54.3 ± 0.5    | 54.2 ± 1.2 **              | 53.8 ± 1.8 *                                | 54.3 ± 1.0 *                              | 54.6 ± 1.1                    | 53.6 ± 1.3 *                 | 54.7 ± 0.4 *       |
| Mean cell hemoglobin,<br>pg                          | 19.0 ± 0.4    | 17.8 ± 0.3 *               | 17.6 ± 0.4                                  | 18.0 ± 0.3                                | 18.3 ± 0.4                    | 18.2 ± 0.5                   | 18.0 ± 0.3         |
| Mean corpuscular<br>hemoglobin<br>concentration, g/l | 350 ± 6       | 329 ± 6                    | 327 ± 5 *                                   | 331 ± 2                                   | 336 ± 3                       | 340 ± 6                      | 329 ± 3            |
| RBC distribution<br>width, %                         | 11.3 ± 0.2    | 12.9 ± 0.5                 | 12.8 ± 0.5                                  | 12.5 ± 0.0                                | 11.9 ± 0.3                    | 11.8 ± 0.4                   | 12.6 ± 0.5         |
| RDW standart deviation,<br>fl                        | 28.0 ± 1.0    | 31.6 ± 2.1                 | 32.3 ± 0.0                                  | 30.8 ± 1.4                                | 29.6 ± 1.0                    | 29.2 ± 1.3                   | 31.6 ± 1.4 *       |
| Platelets, 10 <sup>9</sup> /l                        | 668 ± 25      | 736 ± 72                   | 703 ± 42                                    | 735 ± 33                                  | 706 ± 29                      | 671 ± 31                     | 667 ± 20           |
| Mean platelet volume, fl                             | 5.3 ± 0.1     | 5.5 ± 0.2 **               | 5.5 ± 0.1 *                                 | 5.4 ± 0.1 *                               | 5.4 ± 0.2 *                   | 5.5 ± 0.2 *                  | 5.5 ± 0.1 *        |
| Plateletcrit, cl/l                                   | 0.354 ± 0.016 | 0.406 ± 0.041<br>**        | 0.389 ± 0.027<br>*                          | 0.399 ± 0.016<br>*                        | 0.379 ± 0.022<br>**           | 0.368 ± 0.028<br>*           | 0.369 ± 0.013<br>* |
| Platelet distribution<br>width, %                    | 14.7 ± 1.2    | 15.3 ± 1.1 **              | 15.9 ± 1.3 *                                | 15.2 ± 0.6 *                              | 14.1 ± 0.7 **                 | 15.4 ± 0.9                   | 16.0 ± 0.3 *       |

Data are presented as MEAN ± SD, \* p ≤ 0.05, \*\* p ≤ 0.01 relative to saline group in accordance with Mann-Whitney U-test

Table S11. Inferior vena cava (IVC) stenosis model of venous thrombosis associated with hypercoagulation. Thrombus weights after substance administration in male SD rats (individual values)

| Number of animals in the group | Saline      |             | Heparin, 2 IU/kg, I.V. |              | Dabigatran etexilate, 5 mg/kg P.O. |              | Variegin, 0.175 mg/kg, I.V. |              |
|--------------------------------|-------------|-------------|------------------------|--------------|------------------------------------|--------------|-----------------------------|--------------|
|                                | Wet         | Dry         | Wet                    | Dry          | Wet                                | Dry          | Wet                         | Dry          |
| 1                              | 84.4        | 43.2        | 1.0                    | 0.0          | 15.0                               | 4.5          | 6.2                         | 1.7          |
| 2                              | 35.5        | 12.5        | 6.5                    | 2.6          | 0.0                                | 0.0          | 5.0                         | 1.9          |
| 3                              | 57.0        | 0.0         | 7.8                    | 3.7          | 3.0                                | 0.5          | 14.7                        | 6.1          |
| 4                              | 15.7        | 25.6        | 21.3                   | 7.9          | 0.0                                | 0.0          | 6.5                         | 1.9          |
| 5                              | 0.0         | 4.1         | 31.4                   | 11.1         | 3.0                                | 1.4          | 14.0                        | 5.0          |
| <b>Mean</b>                    | <b>48.2</b> | <b>21.4</b> | <b>13.6 *</b>          | <b>5.1 *</b> | <b>4.2 **</b>                      | <b>1.3 *</b> | <b>9.3 **</b>               | <b>3.3 *</b> |
| SD                             | 29.5        | 17.0        | 12.4                   | 4.4          | 6.2                                | 1.9          | 4.7                         | 2.1          |
| <b>SEM</b>                     | <b>14.7</b> | <b>8.5</b>  | <b>5.6</b>             | <b>2.0</b>   | <b>2.8</b>                         | <b>0.8</b>   | <b>2.1</b>                  | <b>0.9</b>   |

\*  $p \leq 0.05$ , \*\*  $p \leq 0.01$  relative to the "saline" group according to the Mann-Whitney U-test
